# Supplementary material for: COVID-19 Knowledge, Attitudes and Practices and Vaccine Acceptability in Rural Western Kenya and an Urban Informal Settlement in Nairobi, Kenya, May 2021: A Cross-sectional Survey
Source: Preprints.org preprint supplement (doi:10.20944/preprints202208.0333.v1), 2022-08-18

## Supplementary Tables

Table S1: Attitudes of study participants towards COVID-19 in Kibera, Nairobi and Asembo, Siaya County, Kenya.

|                                                                                                                       | Asembo<br>n=458 | Kibera<br>n=398 | p-value           |
|-----------------------------------------------------------------------------------------------------------------------|-----------------|-----------------|-------------------|
| <b>How dangerous do you think COVID-19 is as a risk to your community?</b>                                            |                 |                 |                   |
| Not at all dangerous                                                                                                  | 27(5.9)         | 4(1.0)          | <b>&lt;0.001*</b> |
| Moderately dangerous                                                                                                  | 11(24.2)        | 81(20.4)        | <b>&lt;0.001*</b> |
| Extremely dangerous                                                                                                   | 319(69.7)       | 312(78.4)       | <b>0.004*</b>     |
| Prefer not to answer                                                                                                  | 1(0.2)          | 1(0.3)          | 1                 |
| <b>How worried are you about contracting COVID-19?</b>                                                                |                 |                 |                   |
| Not at all worried                                                                                                    | 44(9.6)         | 71(17.8)        | <b>0.001*</b>     |
| Somewhat worried                                                                                                      | 69(15.1)        | 106(26.6)       | <b>&lt;0.001*</b> |
| Very worried                                                                                                          | 334(75.1)       | 221(55.5)       | <b>&lt;0.001*</b> |
| Prefer not to answer                                                                                                  | 1(0.2)          | 0               | 1                 |
| <b>Overall, how satisfied are you with the measures your county/national government is taking to combat COVID-19?</b> |                 |                 |                   |
| Very satisfied                                                                                                        | 178(38.8)       | 113(28.4)       | <b>0.001*</b>     |
| Satisfied                                                                                                             | 198(43.2)       | 209(52.5)       | <b>0.008*</b>     |
| Very dissatisfied                                                                                                     | 20(4.4)         | 23(5.8)         | 0.4               |
| Don't know                                                                                                            | 52(11.4)        | 47(11.8)        | 0.9               |
| Prefer not to answer                                                                                                  | 10(2.2)         | 6(1.5)          | 0.6               |

**\* Statistically significant (p-value <0.05)**

Table S2: COVID-19 related practices among the study participants.

| Variable                                                                                               | Asembo<br>n=458 | Kibera<br>n=398 | p-value           |
|--------------------------------------------------------------------------------------------------------|-----------------|-----------------|-------------------|
| <b>Measures taken to prevent COVID-19 in the past 7 days</b>                                           |                 |                 |                   |
| Handwashing                                                                                            | 438(95.6)       | 381(95.7)       | 0.7               |
| Use of hand sanitizers                                                                                 | 144(40.2)       | 303(76.1)       | <b>&lt;0.001*</b> |
| Keeping physical distance (>1.5meter)                                                                  | 286(62.4)       | 306(76.9)       | <b>&lt;0.001*</b> |
| Use of face mask                                                                                       | 426(93.0)       | 378(95.0)       | 0.2               |
| Avoiding travel unless necessary                                                                       | 119(26.0)       | 263(66.1)       | <b>&lt;0.001*</b> |
| Avoiding crowded places                                                                                | 323(70.5)       | 293(73.6)       | 0.3               |
| Staying at home                                                                                        | 88(19.2)        | 200(50.3)       | <b>&lt;0.001*</b> |
| <b>Frequency of cleaning hands with soap or alcohol-based hand sanitizer.</b>                          |                 |                 |                   |
| Never                                                                                                  | 3(0.7)          | 3(0.8)          | 1                 |
| Sometimes                                                                                              | 122(26.6)       | 125(31.4)       | 0.1               |
| Always                                                                                                 | 333(72.7)       | 270(67.8)       | 0.2               |
| <b>Frequency of staying at least 1.5 meter (arm's length) away from people outside your household.</b> |                 |                 |                   |
| Never                                                                                                  | 17(3.7)         | 30(7.5)         | <b>0.02*</b>      |
| Sometimes                                                                                              | 243(53.1)       | 205(51.5)       | 0.8               |
| Always                                                                                                 | 198(43.2)       | 163(41.0)       | 0.6               |
| <b>Frequency of wearing a mask or face covering in public.</b>                                         |                 |                 |                   |
| Never                                                                                                  | 5(1.1)          | 7(1.8)          | 0.6               |
| Sometimes                                                                                              | 179(39.1)       | 135(33.9)       | 0.1               |
| Always                                                                                                 | 274(59.4)       | 256(64.3)       | 0.2               |
| <b>Frequency of staying at home.</b>                                                                   |                 |                 |                   |
| Never                                                                                                  | 40(8.7)         | 42(10.6)        | 0.4               |
| Sometimes                                                                                              | 304(66.4)       | 240(60.3)       | 0.1               |
| Always                                                                                                 | 114(24.9)       | 116(29.1)       | 0.2               |
| <b>Attended social gatherings in the last 7 days.</b>                                                  |                 |                 |                   |
| Yes                                                                                                    | 252(55.0)       | 117(29.4)       | <b>&lt;0.001*</b> |
| No                                                                                                     | 206(45.0)       | 281(70.6)       | <b>&lt;0.001*</b> |
| <b>Left the house to go to work or to attend school in the last 7 days.</b>                            |                 |                 |                   |
| Yes                                                                                                    | 267(58.3)       | 259(65.1)       | <b>0.03*</b>      |
| No                                                                                                     | 190(41.5)       | 139(34.9)       | 0.06              |
| Missing                                                                                                | 1(0.2)          | 0               | 0.1               |

**\* Statistically significant (p-value <0.05)**

## Supplementary Figures

Figure S1: Trusted Sources of COVID-19 information

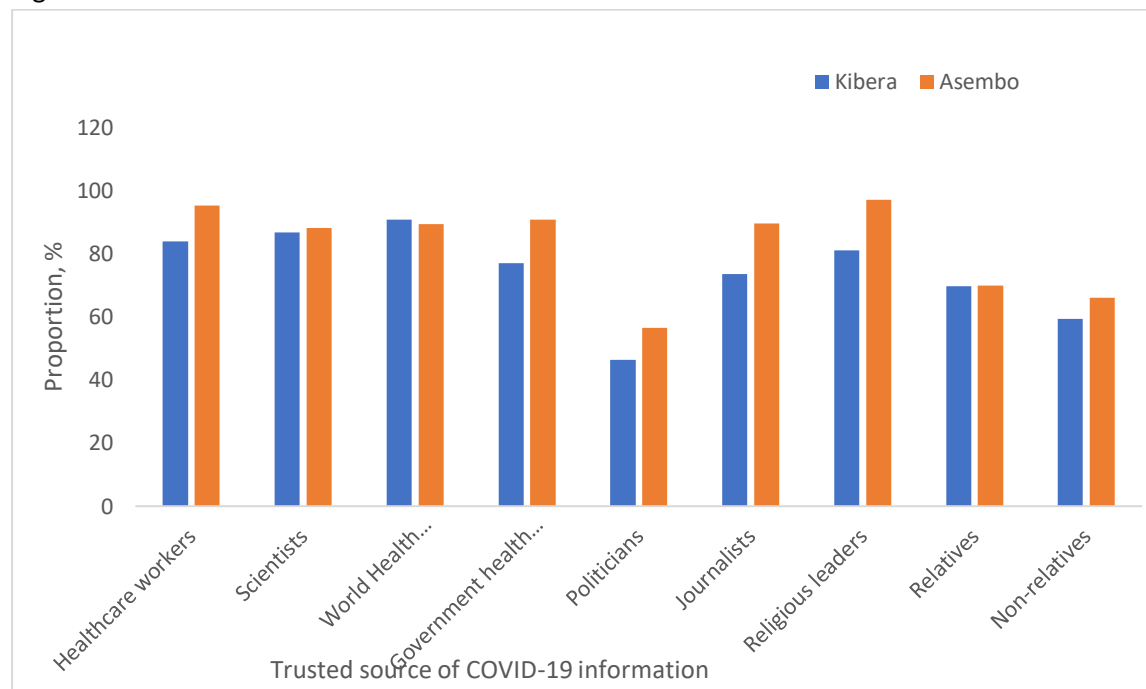

Supplement: Supplementary file 1 [file supplementary]
